# Supplementary material
Source: PubMed Central journal article supplement (PMC3893185)
Supplement: NIHMS223149-supplement-1.pdf [file NIHMS223149-supplement-1.pdf]

Alternative end-joining is suppressed by the canonical NHEJ component  
*Xrcc4*/ligase IV during chromosomal translocation formation  
 Deniz Simsek and Maria Jasin

**Supplementary Figure 1**

**a *Xrcc4* allelic series (chr. 13)**

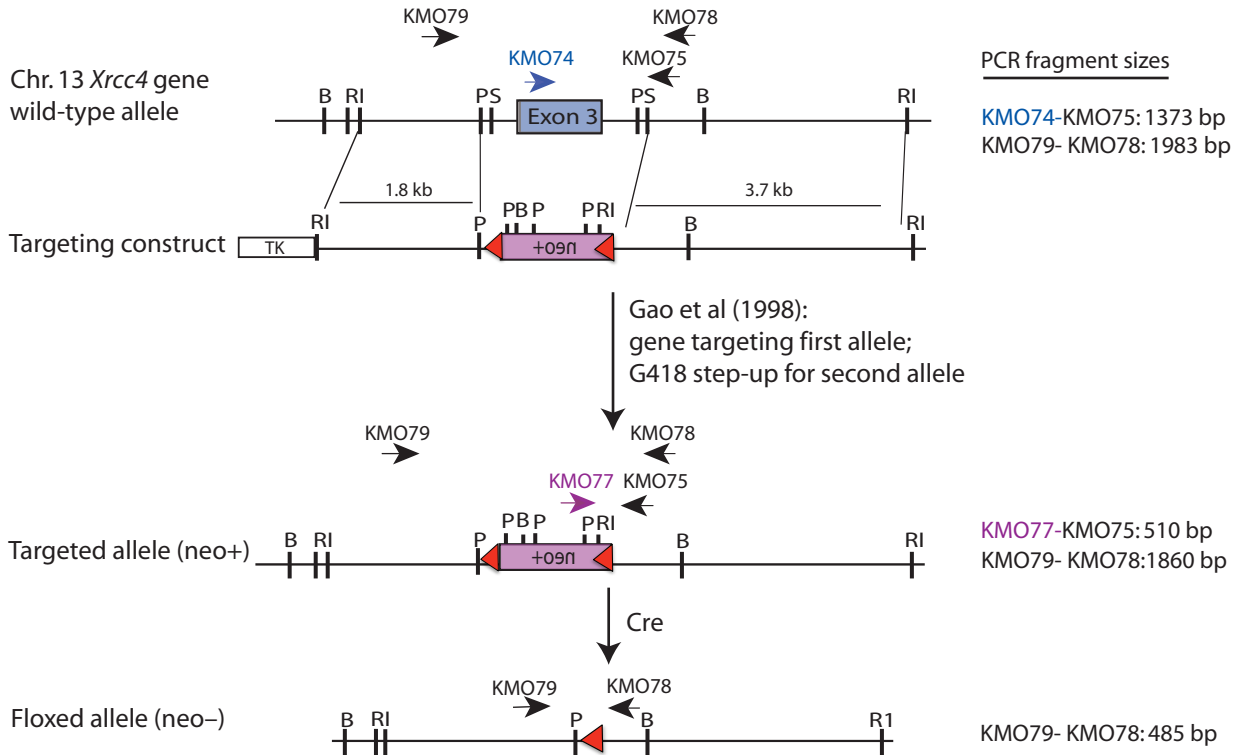

**b *Xrcc4* allelic series primers**

KMO74: GGAGATTCCCAAGAAGCTGATGAC  
 KMO75: TCCAGCTAACCAGCATCAATA  
 KMO77: CTGCTAAAGCGCATGCTCCAGACTGC  
 KMO78: ATATCTGGAACGCAGCCACT  
 KMO79: TCCTGCATGGAGCATTATCA

**c Chromosome FISH**

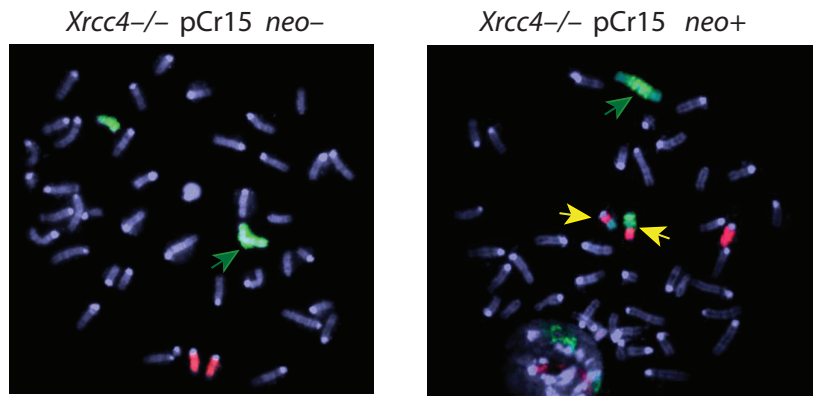

chr. 14, green; chr. 17, red

**d Der(17) break point junction primer positions**

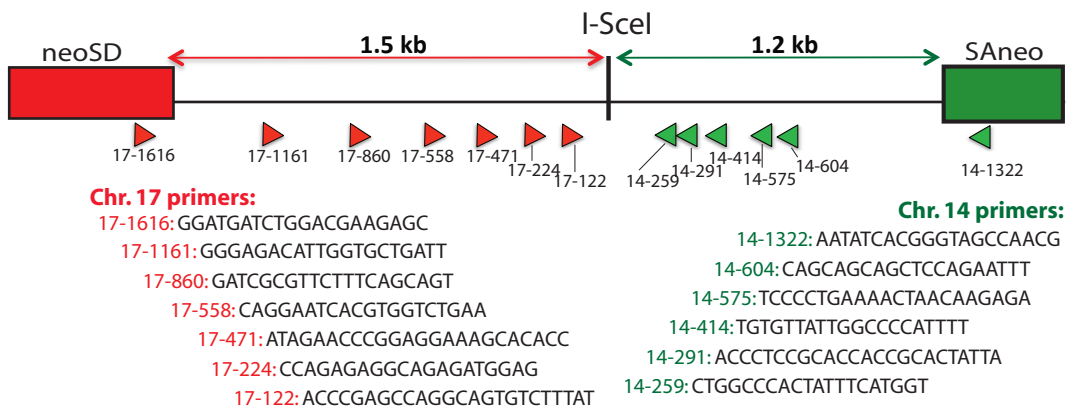

## Supplementary Figure 1

- (a) Derivation of *Xrcc4*<sup>-/-</sup> mouse ES cells used in this study. Gene targeting was previously performed to delete exon 3 of *Xrcc4*, which is predicted to result in expression of the first 46 amino acids of the *Xrcc4* protein, followed by a frameshift and termination in exon 4<sup>26</sup>. Gene targeted clones were then subjected to increased G418 concentrations to identify cells in which the *neo*+ gene replaced exon 3 of both *Xrcc4* alleles<sup>26</sup>. To delete the *neo*+ gene from both alleles at the *loxP* sites (red triangles), Cre recombinase was expressed and *neo*- clones were identified.
- RI, EcoRI; B, BamHI; P, PstI; S, SacI; H, HindIII.
- (b) Primer sequences used for *Xrcc4*<sup>-/-</sup> genotyping.
- (c) Fluorescence *in situ* hybridization (FISH) of parental *Xrcc4*<sup>-/-</sup> pCr15 cells and a *neo*+ translocation clone derived from them. The translocation clone has the expected derivative chromosomes (yellow arrows) derived from chrs. 17 and 14. Parental cells and all *neo*+ clones derived from them also contain a pre-existing Robertsonian translocation involving chr.14 (green arrow) that is not involved in I-SceI induced translocations since the *SAneo* gene (Fig. 1) is integrated into the normal chr.14 in the cells.
- (d) Der(17) primers used to PCR amplify breakpoint junctions of *neo*+ translocation clones. Each primer is named for the chromosome of origin, followed by the distance to the I-SceI site (e.g., 17-1616 means that the primer is 1,616 bp away from the I-SceI site on chr.17).

## Supplementary Figure 2

**a** WILD-TYPE

Chr. 17

CCGAGTTC AAGGCCAGCC **TAGGGATAA**  
GGCTCAAGTTC CGGTCGGATCCC

Chr. 14

**CCCTAACAGGGTAATGCATGCAA**  
**AATAGGGATTGTC**CCATTACGTACGTT

| TRANSLOCATION CLONES | TRANSLOCATION JUNCTIONS                  |                                           |
|----------------------|------------------------------------------|-------------------------------------------|
| E13P10               | CCGAGTTC AAGGCCAGCC <b>TAGGGAT</b> ..    | .. <b>TATCCCTAACAGGGTAATGCATGCAA</b>      |
| E14P8                | CCGAGTTC AAGGCCAGCC <b>TAGGGATAA</b>     | +126bp .. <b>TCCCTAACAGGGTAATGCATGCAA</b> |
| E13P18, E14P3        | CCGAGTTC AAGGCCAGCC <b>TAGGGATA</b> ..   | .. <b>TCCCTAACAGGGTAATGCATGCAA</b>        |
| E13P24               | CCGAGTTC AAGGCCAGCC <b>TAGGGAT</b> .. TA | ..... <b>CCCTAACAGGGTAATGCATGCAA</b>      |
| E13P6                | CCGAGTTC AAGGCCAGCC <b>TAGGGATA</b> ..   | ..... <b>TACAGGGTAATGCATGCAA</b>          |
| E13P7                | CCGAGTTC AAGGCCAGCC <b>TA</b> ..         | ..... <b>CCCTAACAGGGTAATGCATGCAA</b>      |
| E14P7                | CCGAGTTC AAGGCCAGCC <b>TAGGGA</b> ..     | ..... <b>ACAGGGTAATGCATGCAA</b>           |
| E14P10               | CCGAGTTC AAGGCCAGCC <b>TAGGGATAA</b> T   | ..... <b>GGTAATGCATGCAA</b>               |
| E13P13               | CCGAGTTC AAGGCCAGCC ..                   | +47bp .. <b>TCCCTAACAGGGTAATGCATGCAA</b>  |
| E13P4                | CCGAGTTC AAGGCCAGCC <b>TA</b> ..         | ..... <b>ACAGGGTAATGCATGCAA</b>           |
| E13P14               | CCGAGTTC AAGGCCAGC ..                    | ..... <b>TACAGGGTAATGCATGCAA</b>          |
| E14P5, E14P18        | CCGAGTTC AAGGCCAGCC <b>TAGGG</b> ..      | ..... <b>GTAATGCATGCAA</b>                |
| E14P6, E13P11        | CCGAGTTC AAGGCCAGCC <b>TAGGGATAA</b> ..  | ..... <b>TGCATGCAA</b>                    |
| E13P1, E14P4         | CCGAGTTC AAGGCCAGCC <b>TAGGG</b> ..      | ..... <b>TAATGCATGCAA</b>                 |
| E13P19               | CCGAGTTC AAGGCCAGCC <b>TAG</b> ..        | ..... <b>TAATGCATGCAA</b>                 |
| E13P5                | CCGAGTTC AAGGCCAGCC <b>TAGGGAT</b> ..    | ..... <b>GCATGCAA</b>                     |
| E13P20               | CCGAGTTC AAGGCCAGCC <b>TA</b> ..         | ..... <b>TAATGCATGCAA</b>                 |
| E14P19               | CCGAGTTC AAGGCCAG ..                     | ..... <b>GGTAATGCATGCAA</b>               |
| E14P24               | CCGAGTTC A ..                            | ..... <b>AATGCATGCAA</b>                  |
| E14P14               | CCGAGTTC AAGGCCAGC ..                    | ..... <b>AAGC</b>                         |
| E13P3                | CCGAGTTC AAGGCCAGCC <b>TAGG</b> ..       | ..... <b>-33del CTC</b>                   |
| E14P22               | CCGAGTTC A ..                            | ..... <b>-40del ATG</b>                   |
| E13P8                | <b>TAG</b> <b>-35del</b>                 | ..... <b>-28del CTT</b>                   |
| E14P18               | <b>TAG</b> <b>-43del</b>                 | TAACTGGTAATGCATGCTTT <b>-32del GCT</b>    |
| E13P23               | <b>GCC</b> <b>-136 del</b>               | ..... <b>CTAACAGGGTAATGCATGCAA</b>        |
| E14P17               | CCGAGTTC AAGGCCAGCC <b>TA</b> ..         | +184bp <b>-177del AAT</b>                 |
| E14P13               | <b>GCT</b> <b>-155del</b>                | ..... <b>-35del CCG</b>                   |
| E13P12               | CCGAGTTC AAGGCCAGCC <b>TAGGGATA</b> ..   | ..... <b>-190del CAT</b>                  |
| E13P21               | <b>TTT</b> <b>-62del</b>                 | ..... <b>-230del AAG</b>                  |
| E14P15               | <b>TAGGGT</b> <b>-282del</b>             | ..... <b>AATGCATGCAA</b>                  |
| E14P16               | <b>AAT</b> <b>-99del</b>                 | ..... <b>-214del TAA</b>                  |
| E14P20               | <b>TGG</b> <b>-353del</b>                | GGCCTCTA .. <b>GGTAATGCATGCAA</b>         |
| E14P9                | CCGAGTTC AAGGCCAGCC <b>TA</b> ..         | +376bp <b>-362del ACC</b>                 |
| E13P17               | <b>AGA</b> <b>-219del</b>                | ..... <b>-179del ATA</b>                  |
| E13P15               | <b>CGA</b> <b>-125del</b>                | ..... <b>-485del AGC</b>                  |
| E14P21               | CCGAGTTC AAGGCCAGCC <b>TAGGGA</b> ..     | ..... <b>-838del GTC</b>                  |
| E13P16               | CCGAGTTC AAGGCCAGCC <b>TAG</b> ..        | A <b>-994del TTG</b>                      |

Supplementary Figure 2, cont'

**b** *Xrcc4*<sup>-/-</sup> cells

Chr. 17

CCGAGTTC AAGGCCAGCC TAGGGATAA  
GGCTCAAGTTC CGGTCGGATCCC

Chr. 14

CCCTAACAGGGTAATGCATGCAA  
AATAGGATTTGCCATTACGTACGTT

| TRANSLOCATION CLONES           | TRANSLOCATION JUNCTIONS           |                                    |
|--------------------------------|-----------------------------------|------------------------------------|
| E13U25                         | CCGAGTTC AAGGCCAGCC TAGGGATAA     | CAGGG .TATCCCTAACAGGGTAATGCATGCAA  |
| E13U6                          | CCGAGTTC AAGGCCAGCC TAGGGATAA     | .TATCCCTAACAGGGTAATGCATGCAA        |
| E13U28, E13U38                 | CCGAGTTC AAGGCCAGCC TAGGGATAA     | ..TCCCTAACAGGGTAATGCATGCAA         |
| E13U31                         | CCGAGTTC AAGGCCAGCC TAGGGAT..     | .TATCCCTAACAGGGTAATGCATGCAA        |
| E14U3                          | CCGAGTTC AAGGCCAGCC TAGGGATAA     | ..TCCCTAACAGGGTAATGCATGCAA         |
| E14U23                         | CCGAGTTC AAGGCCAGCC TAGGG....     | .TATCCCTAACAGGGTAATGCATGCAA        |
| E14U17                         | CCGAGTTC AAGGCCAGCC TAGGGA....    | ..TCCCTAACAGGGTAATGCATGCAA         |
| E14U31                         | CCGAGTTC AAGGCCAGCC TAGG.....     | .ATCCCTAACAGGGTAATGCATGCAA         |
| E14U41                         | CCGAGTTC AAGGCCAGCC..... ATTGTA   | TTATCCCTAACAGGGTAATGCATGCAA        |
| E13U18, E13U35                 | CCGAGTTC AAGGCCAGCC TAGGGATAA     | .....CAGGGTAATGCATGCAA             |
| E14U24                         | CCGAGTTC AAGGCCAGCC TAGGG.... GCT | .....CTAACAGGGTAATGCATGCAA         |
| E13U40                         | CCGAGTTC AAGGCC..... TAGGGGATAT   | TTATCCCTAACAGGGTAATGCATGCAA        |
| E14U43                         | CCGAGTTC AAGGCCAGCC TAGGGATAA     | +87bp .....GGTAATGCATGCAA          |
| E14U44, E13U12                 | CCGAGTTC AAGGCC.....              | .....TAACAGGGTAATGCATGCAA          |
| E13U10, E13U17, E13U26, E13U   | CCGAGTTC AAGGCCAGCC TA.....       | .....ACAGGGTAATGCATGCAA            |
| E14U13                         | CCGAGTTC AAGGCCAGCC TA.....       | .....CAGGGTAATGCATGCAA             |
| E13U34                         | CCGAGTTC AAGGCCAGCC T.....        | .....CAGGGTAATGCATGCAA             |
| E13U11, E13U36                 | CCGAGTTC AAGGCCAGCC TAGGGATAA     | .....TGATGCATGCAA                  |
| E13U15, E13U30, E14U1, E14U19, | CCGAGTTC AAGGCCAGCC TAGGG....     | .....TAATGCATGCAA                  |
| E13U41                         | CCGAGTTC AAGGCCAGCC TAGGGATAA     | .....CATGCAA                       |
| E13U29, E13U43                 | CCGAGTTC AAGGCCAGCC TAGGGA....    | .....ATGCATGCAA                    |
| E14U14, E14U36                 | CCGAGTTC AAGGCCAGCC.....          | .....AGGGTAATGCATGCAA              |
| E13U23                         | CCGAGTTC AAGGCCAGCC TAGGGAT..     | .....GCATGCAA                      |
| E14U25                         | CCGAGTTC AAGGCCAGCC TAGG.....     | .....TAATGCATGCAA                  |
| E13U38                         | CCGAGTTC AAGGCCAGCC TA..... T     | .....GGTAATGCATGCAA                |
| E14U2                          | CCGAGTTC AAGGCCAGCC TAG.....      | .....TAATGCATGCAA                  |
| E13U32                         | CCGAGTTC AAGGCCAGCC TAGGGAT..     | .....GCAA                          |
| E14U39                         | CCGAGTTC AAGGC..... T             | .....GGTAATGCATGCAA                |
| E13U45                         | CCGAGTTC AAGG.....                | .....AATGCATGCAA                   |
| E14U21                         | CCGAGTTC AAGGCC.....              | .....TAATGCATGCAA                  |
| E14U12                         | CCGAGTTC AAGG.....                | .....TAATGCATGCAA                  |
| E13U4                          | CCGAGTTC AAGGCCAGC.....           | .....ATGCAA                        |
| E14U11                         | CCGAGTTC AAGGCCAGC.....           | .....AA                            |
| E13U5                          | CCGAGTTC AAGGCCAGCC TAGGGA....    | -39del AAT                         |
| E13U21                         | TCC.....                          | .....TGATGCAA                      |
| E14U15                         | GGCA -32del                       | .....TGCAA                         |
| E13U1                          | GGCA -32del                       | .....AGC                           |
| E14U32                         | CCGAGTTC AAGGCCAGCC TAGGGATAA     | +231bp -56del AAC                  |
| E14U38                         | AGG -38del                        | .....CATGCAA                       |
| E14U33                         | AGG -44del                        | G -35del CCG                       |
| E13U16                         | AAAC -90del                       | .....AGGGTAATGCATGCAA              |
| E13U33                         | CCGAGTTC AAGGCCAGCC TA.....       | +207bp -95del CAA                  |
| E13U9                          | CCGAGTTC AA.....                  | +118bp -104del AGA                 |
| E14U26                         | CCGAGTTC AAGGCCAGCC.....          | CTTGGGAGG -113del AGC              |
| E14U29                         | CCGAGTTC AAGGCCAGC.....           | -116del TAA                        |
| E14U28                         | GAG -124del                       | .....TAACAGGGTAATGCATGCAA          |
| E13U27                         | CCGAGTTC AAGGC.....               | +105bp -132del ACT                 |
| E14U30                         | GCCT -165del                      | .....AACAGGGTAATGCATGCAA           |
| E13U42                         | GCAG -220del                      | .....GGTAATGCATGCAA                |
| E13U20                         | CCGAGTTC AAGGCCAGCC TAGGGATAA     | CAAAAT -280del GGA                 |
| E13U46                         | TTAA -147bp                       | -137del GTA                        |
| E14U42                         | AAGGG -297del                     | .....TAATGCATGCAA                  |
| E14U27                         | ATT -321del                       | .....CCTAACAGGGTAATGCATGCAA        |
| E13U22                         | CAC -134del                       | -201del GAG                        |
| E13U47                         | CCGAGTTC AAGGCCAGC.....           | -319del GAG                        |
| E13U3                          | GGA -151del                       | -209del GAA                        |
| E13U44                         | CCGAGTTC AAG.....                 | -463del AAG                        |
| E14U37                         | CCC -52del                        | -410del GGG                        |
| E14U9                          | CCGAGTTC AAGGCCAGCC TAGGGATAA     | T -548del AGT                      |
| E14U34                         | TTT -596del                       | .....AGGGTAATGCATGCAA              |
| E13U37                         | TTA -61del                        | -612del CTG                        |
| E14U18                         | GCC -122del                       | -576del TCT                        |
| E13U8                          | TCATT -251del                     | -504del CTT                        |
| E14U26                         | ACA -785del                       | +135bp .....CCTAACAGGGTAATGCATGCAA |
| E13U7                          | CCGAGT.....                       | -840del CAT                        |
| E14U20                         | CCGAGTTC AAGGCCA.....             | -914del ACT                        |
| E14U35                         | GGG -505del                       | -455del CTA                        |
| E14U40                         | CAC -457del                       | +124bp -512del TAT                 |
| E13U13                         | TTC -333del                       | -659del CAC                        |
| E14U16                         | AGT -115del                       | ATAC -888del CTC                   |
| E14U8                          | CCGAGTTC AAGGCCAGCC TAGGGATAA     | -1061del CCT                       |
| E14U7                          | CCGAGTTC AAGGCCAGCC TAGGGATAA     | -1076del CGT                       |
| E13U2                          | CCGAGTTC AAG.....                 | -1050del CCG                       |
| E14U6                          | GAG -503del                       | +69bp -1032del TCC                 |
| E14U22                         | ATT -924del                       | -1065del TGA                       |

Supplementary Figure 2, con't

Chr. 17 Chr. 14  
**C** *Xrcc4*<sup>-/-</sup> +*Xrcc4* CCGAGTTC AAGGCCAGCC TAGGGATAA CCCTAACAGGGTAATGCATGCAA  
 GGCTCAAGTTC CGGTCCGGATCC C AATAGGGATTGTC CCACTTACGTACGTT

| TRANSLOCATION CLONES            | TRANSLOCATION JUNCTIONS                                                   |
|---------------------------------|---------------------------------------------------------------------------|
| E13X5, E13X9, E14X37            | CCGAGTTC AAGGCCAGCC TAGGGAT . . . . . TATCCCTAACAGGGTAATGCATGCAA          |
| E13X6, E14X17                   | CCGAGTTC AAGGCCAGCC TAGGGATAA . . . . . TCCTAACAGGGTAATGCATGCAA           |
| E14X8                           | CCGAGTTC AAGGCCAGCC TAGGGATA . . . . . TCCTAACAGGGTAATGCATGCAA            |
| E13X38                          | CCGAGTTC AAGGCCAGCC TAGGGATAA TA . . . . . CCCTAACAGGGTAATGCATGCAA        |
| E14X1                           | CCGAGTTC AAGGCCAGCC TAGGGATAA CAGGGTAATG . . . . . CCTAACAGGGTAATGCATGCAA |
| E14X12                          | CCGAGTTC AAGGCCAGCC TAGGGATA . . . . . TAACAGGGTAATGCATGCAA               |
| E13X20                          | CCGAGTTC AAGGCCAGCC TAGGGAT . . . . . TAACAGGGTAATGCATGCAA                |
| E14X22                          | CCGAGTTC AAGGCCAGCC TAGGGATAA . . . . . ACAGGGTAATGCATGCAA                |
| E14X15                          | CCGAGTTC AAGGCCAGCC TA . . . . . TCCTAACAGGGTAATGCATGCAA                  |
| E13X26, E14X41                  | CCGAGTTC AAGGCCAGCC TAGGGATAA . . . . . CAGGGTAATGCATGCAA                 |
| E14X18, E14X32, E14X43          | CCGAGTTC AAGGCCAGCC TAGGG . . . . . TAACAGGGTAATGCATGCAA                  |
| E14X42                          | CCGAGTTC AAGGCCAGCC T . . . . . CCCTAACAGGGTAATGCATGCAA                   |
| E14X3                           | CCGAGTTC AAGGCCAGCC TAGGGA . . . . . ACAGGGTAATGCATGCAA                   |
| E13X16                          | CCGAGTTC AAGGCCAGCC . . . . . CTACAGGGTAATGCATGCAA                        |
| E14X14                          | CCGAGTTC AAGGCCAGCC T . . . . . AACAGGGTAATGCATGCAA                       |
| E13X45, E14X39                  | CCGAGTTC AAGGCCAGCC TA . . . . . ACAGGGTAATGCATGCAA                       |
| E13X21                          | CCGAGTTC AA . . . . . TTATCCCTAACAGGGTAATGCATGCAA                         |
| E13X28, E14X34                  | CCGAGTTC AAGGCCAGCC TAGGGATAA . . . . . TGCATGCAA                         |
| E14X33                          | CCGAGTTC . . . . . TTATCCCTAACAGGGTAATGCATGCAA                            |
| E13X1, E13X19, E14X9, E14X38, E | CCGAGTTC AAGGCCAGCC TAGGG . . . . . TAATGCATGCAA                          |
| E14X45                          | CCGAGTTC AAGGCCAGCC TAGG . . . . . TAATGCATGCAA                           |
| E13X32, E13X48, E14X40          | CCGAGTTC AAGGCCAGCC TAG . . . . . TAATGCATGCAA                            |
| E13X4                           | CCGAGTTC AAGGCCAGCC TAGGGAT . . . . . GCATGCAA                            |
| E13X39                          | CCGAGTTC AAGGCCAGCC TA . . . . . TAATGCATGCAA                             |
| E13X35                          | CCGAGT . . . . . ATCCCTAACAGGGTAATGCATGCAA                                |
| E13X17                          | CCGAGTTC AAGGCC . . . . . CAGGGTAATGCATGCAA                               |
| E13X8                           | CCGAGTTC AAGGCCAGC . . . . . TAATGCATGCAA                                 |
| E14X47                          | CCGAGTTC AAGGCCAGCC . . . . . AATGCATGCAA                                 |
| E13X42                          | CCGAGTTC AAGGCCAG . . . . . GGTAATGCATGCAA                                |
| E13X23                          | CCGAGTTC AAGGCCAGCC TAGGGAT . . . . . GCAA                                |
| E13X46                          | CCG . . . . . TCCTAACAGGGTAATGCATGCAA                                     |
| E13X22                          | CCGAGTTC AA . . . . . +134bp . . . . . AGGGTAATGCATGCAA                   |
| E13X10                          | CCGAGTTC AAGGCCAGCC TAGGGA . . . . . +33bp . . . . . A                    |
| E13X47                          | CCGAGTTC AAGGCCAGCC . . . . . GCAA                                        |
| E13X34                          | CCGAGTTC AAGGCCAGC . . . . . ATGCAA                                       |
| E14X44                          | CCGAGTTC AAGGCCA . . . . . TGCAA                                          |
| E14X19                          | TCC . . . . . TAACAGGGTAATGCATGCAA                                        |
| E14X11                          | CCG . . . . . GGTAATGCATGCAA                                              |
| E14X7                           | GGC -33del . . . . . CCTAACAGGGTAATGCATGCAA                               |
| E14X29                          | GTA -36del . . . . . ACAGGGTAATGCATGCAA                                   |
| E14X6                           | CCGAGTTC AAGGCCAGCC . . . . . AGAATGAA -37del GAA                         |
| E14X30                          | GTA -42del . . . . . ACAGGGTAATGCATGCAA                                   |
| E14X26                          | CCGAGTTC AAGGCCAGCC TAGGG . . . . . CACT -45del TTT                       |
| E14X27                          | CCGAGTTC AAGGCCAGCC TAGGGA . . . . . CACTT -48del TGT                     |
| E13X27                          | AGGTA -42del . . . . . ATGCATGCAA                                         |
| E13X44                          | TAA -60del . . . . . CCTAACAGGGTAATGCATGCAA                               |
| E13X24                          | CCGAGTTC AAGGCCAGCC TAGGGA . . . . . -114del GCT                          |
| E14X5                           | GCAG -116del . . . . . GGTAATGCATGCAA                                     |
| E14X21                          | TAGAG -39del . . . . . -88del AAA                                         |
| E13X37                          | CCGAGTTC AAGGCCAGCC TAGGG . . . . . +92bp -127del AGC                     |
| E13X11                          | CCGAGTTC AAGGCCAGC . . . . . -112del GAG                                  |
| E13X12                          | CCGAGTTC AAGGCCAGC . . . . . T -128del GCC                                |
| E14X48                          | ACCC -127del . . . . . TAACAGGGTAATGCATGCAA                               |
| E14X4                           | CCGAGTTC AAGGCCAGCC TA . . . . . -133del CTA                              |
| E13X14                          | GGCA -117del . . . . . -26del AGC                                         |
| E14X31                          | CCGAGTTC AAGGCCAGCC TAGGG . . . . . +54bp -171del CTC                     |
| E13X7                           | CAT -245del . . . . . AACAGGGTAATGCATGCAA                                 |
| E13X25                          | GAT -29del . . . . . +51bp -232del ACA                                    |
| E14X24                          | CCAG -269del . . . . . GGTAATGCATGCAA                                     |
| E14X36                          | CAA -181del . . . . . +263bp -184del CAC                                  |
| E14X28                          | CCCG -418del . . . . . -38del AAA                                         |
| E14X20                          | AAAAA -202del . . . . . -318del TGA                                       |
| E13X40                          | ACC -536del . . . . . CTACAGGGTAATGCATGCAA                                |
| E14X46                          | GAA -92del . . . . . -459del TAA                                          |
| E13X33                          | TGT -530del . . . . . TGCATGCAA                                           |
| E13X36                          | AGG -514del . . . . . -33del CTC                                          |
| E14X2                           | CCGAGTTC AAGGCCAGCC TAGG . . . . . -621del ATG                            |
| E13X43                          | CCC -634del . . . . . AAT . . . . . TAACAGGGTAATGCATGCAA                  |
| E14X10                          | GCC -389del . . . . . -333del CTG                                         |
| E14X25                          | CCT -51del . . . . . +38bp -768del TCT                                    |
| E14X16                          | CCGAGTTC AAGGCCAGCC TAGG . . . . . -836del AGT                            |
| E13X15                          | TGC -480del . . . . . AA -508del GTG                                      |
| E13X3                           | GCA -221del . . . . . -908del AAC                                         |
| E14X23                          | GGCTG -713del . . . . . -534del GGT                                       |
| E13X2                           | TTA -1275del . . . . . +137bp . . . . . CCTAACAGGGTAATGCATGCAA            |
| E14X35                          | TGG -965del . . . . . +396bp -892del AAC                                  |
| E14X13                          | GGTTC -1003del . . . . . -1154del CTT                                     |

Supplementary Figure 2, con't

d *Ku70*<sup>-/-</sup> cells

Chr. 17 CCGAGTTCAAGGCCAGCC**TAGGGATAA**  
GGCTCAAGTTCGGTCGG**ATCCC**

Chr. 14 CCCTAACAGGGTAATGCATGCAA  
AATAGGGATTGTCCATTACGTACGTT

| TRANSLOCATION CLONES | TRANSLOCATION JUNCTIONS                       |                                             |
|----------------------|-----------------------------------------------|---------------------------------------------|
| E13K24               | CCGAGTTCAAGGCCAGCC <b>TAGGGAT</b> . . . . .   | . . . . . ATCCCTAACAGGGTAATGCATGCAA         |
| E14K13               | CCGAGTTCAAGGCCAGCC <b>TAGGGATAA</b> +42bp     | . . . . . CCCTAACAGGGTAATGCATGCAA           |
| E13K6                | CCGAGTTCAAGGCCAGCC <b>TAGGGATAA</b> . . . . . | GGCGCGCCA . . . . . CCCTAACAGGGTAATGCATGCAA |
| E13K23               | CCGAGTTCAAGGCCAGCC <b>TA</b> . . . . .        | CAGAG . . . . . TCCCTAACAGGGTAATGCATGCAA    |
| E14K6                | CCGAGTTCAAGGCCAGCC <b>TAGGGATAA</b> . . . . . | . . . . . CAGGGTAATGCATGCAA                 |
| E14K3                | CCGAGTTCAAGGCCAGCC <b>TA</b> . . . . .        | . . . . . ACAGGGTAATGCATGCAA                |
| E13K22               | CCGAGTTCAAGGCCAGCC <b>TAGGG</b> . . . . .     | +27bp . . . . . GTAATGCATGCAA               |
| E14K1, E14K20        | CCGAGTTCAAGGCCAGCC <b>TAGGG</b> . . . . .     | . . . . . TAATGCATGCAA                      |
| E13K20               | CCGAGTTCAAGGCCAGCC <b>T</b> . . . . .         | . . . . . TAATGCATGCAA                      |
| E13K19               | CCGAGTTCAAGGCCAGCC <b>TA</b> . . . . .        | . . . . . AATGCATGCAA                       |
| E13K21               | CCGAGTTCAAGGCCAGCC <b>TAGGGAT</b> . . . . .   | . . . . . TGCAA                             |
| E13K17               | CCGAGTTCAAGGCCAGC . . . . .                   | . . . . . GTAATGCATGCAA                     |
| E13K7                | CCGAGTTCAAGGCCAGCC <b>TAGGG</b> . . . . .     | +113bp . . . . . CAA                        |
| E14K17               | CCGAGTTCAAGG . . . . .                        | . . . . . GTAATGCATGCAA                     |
| E14K10               | CCGAGTTCAAGGCCAGCC <b>TAG</b> . . . . .       | . . . . . -28del CTT                        |
| E14K18               | CCGAGTTCAA . . . . .                          | . . . . . TGCATGCAA                         |
| E14K19               | CCGAGT . . . . .                              | . . . . . AATGCATGCAA                       |
| E13K11               | CCGAGTTCAAGGCCAGC . . . . .                   | . . . . . -29del TTG                        |
| E14K5                | GAT -29del . . . . .                          | TTC . . . . . GGGTAATGCATGCAA               |
| E13K12               | CCGAGTTCAAGGCCA . . . . .                     | . . . . . -38del AAA                        |
| E13K8                | TCTCCGA . . . . .                             | . . . . . -39del AAT                        |
| E14K7                | CCGAGTTCAAGGCCAGCC <b>TAGGG</b> . . . . .     | . . . . . -71del GAC                        |
| E14K2                | TCT -69del . . . . .                          | CT . . . . . AGGGTAATGCATGCAA               |
| E13K4                | CCGAGTTCAAGGCCAGCC <b>TA</b> . . . . .        | TCCCTA . . . . . -102del TGA                |
| E14K11               | ATA -98del . . . . .                          | . . . . . GGGTAATGCATGCAA                   |
| E13K3                | CCGAGTTCAAGGCCAGCC <b>TAGGGATAA</b> . . . . . | +199bp . . . . . -130del CTA                |
| E14K21               | ACCC -127del . . . . .                        | . . . . . TAACAGGGTAATGCATGCAA              |
| E13K9                | CAA -131del . . . . .                         | . . . . . GGGTAATGCATGCAA                   |
| E14K15               | GGCA -117del . . . . .                        | . . . . . -26del AGC                        |
| E13K1                | CCT -51del . . . . .                          | . . . . . -117del AAG                       |
| E13K15               | GGA -151del . . . . .                         | +243bp . . . . . GCATGCAA                   |
| E14K4                | CCGAGTTCAAGGCCAGCC <b>TAGG</b> . . . . .      | . . . . . -197del CTG                       |
| E14K16               | CCGAGTTCAAGGCCAGCC <b>T</b> . . . . .         | . . . . . -239del TGA                       |
| E13K5                | CCA -269del . . . . .                         | AGGG . . . . . -29del TTG                   |
| E13K18               | CCGAGTTCAAGGCCAGCC <b>TAGGGATAA</b> . . . . . | . . . . . -297del GCG                       |
| E14K12               | CCGAGTTCAAGGCCAGCC <b>TAGGG</b> . . . . .     | . . . . . -312del GCA                       |
| E13K2                | TGG -214del . . . . .                         | . . . . . -453del GCT                       |
| E14K22               | TCT -942del . . . . .                         | . . . . . AACAGGGTAATGCATGCAA               |
| E14K14               | CCGAGTTCAAGGCCAGCC <b>TAG</b> . . . . .       | CT . . . . . -1137del CAG                   |
| E14K24               | TTGTGGG -1089del . . . . .                    | . . . . . -313del CAA                       |

## Supplementary Figure 2

Der(17) translocation junction sequences obtained from pCr15 wild-type (**a**), *Xrcc4*<sup>-/-</sup> (**b**), *Xrcc4*-complemented *Xrcc4*<sup>-/-</sup> (**c**), and *Ku70*<sup>-/-</sup> (**d**) *neo*<sup>+</sup> clones. DNA ends generated by I-SceI on chrs.17 and 14 are indicated in red and blue, respectively. Sequences are annotated as follows: del, deletion length from the DNA end after DSB formation; underline, microhomology; middle black letters, sequence of short insertion; +, length of long insertion. If the deletion extends beyond the chromosome sequence indicated at the top of the figure, a few bp flanking the deletion are indicated, with microhomology underlined.

### Supplementary Figure 3

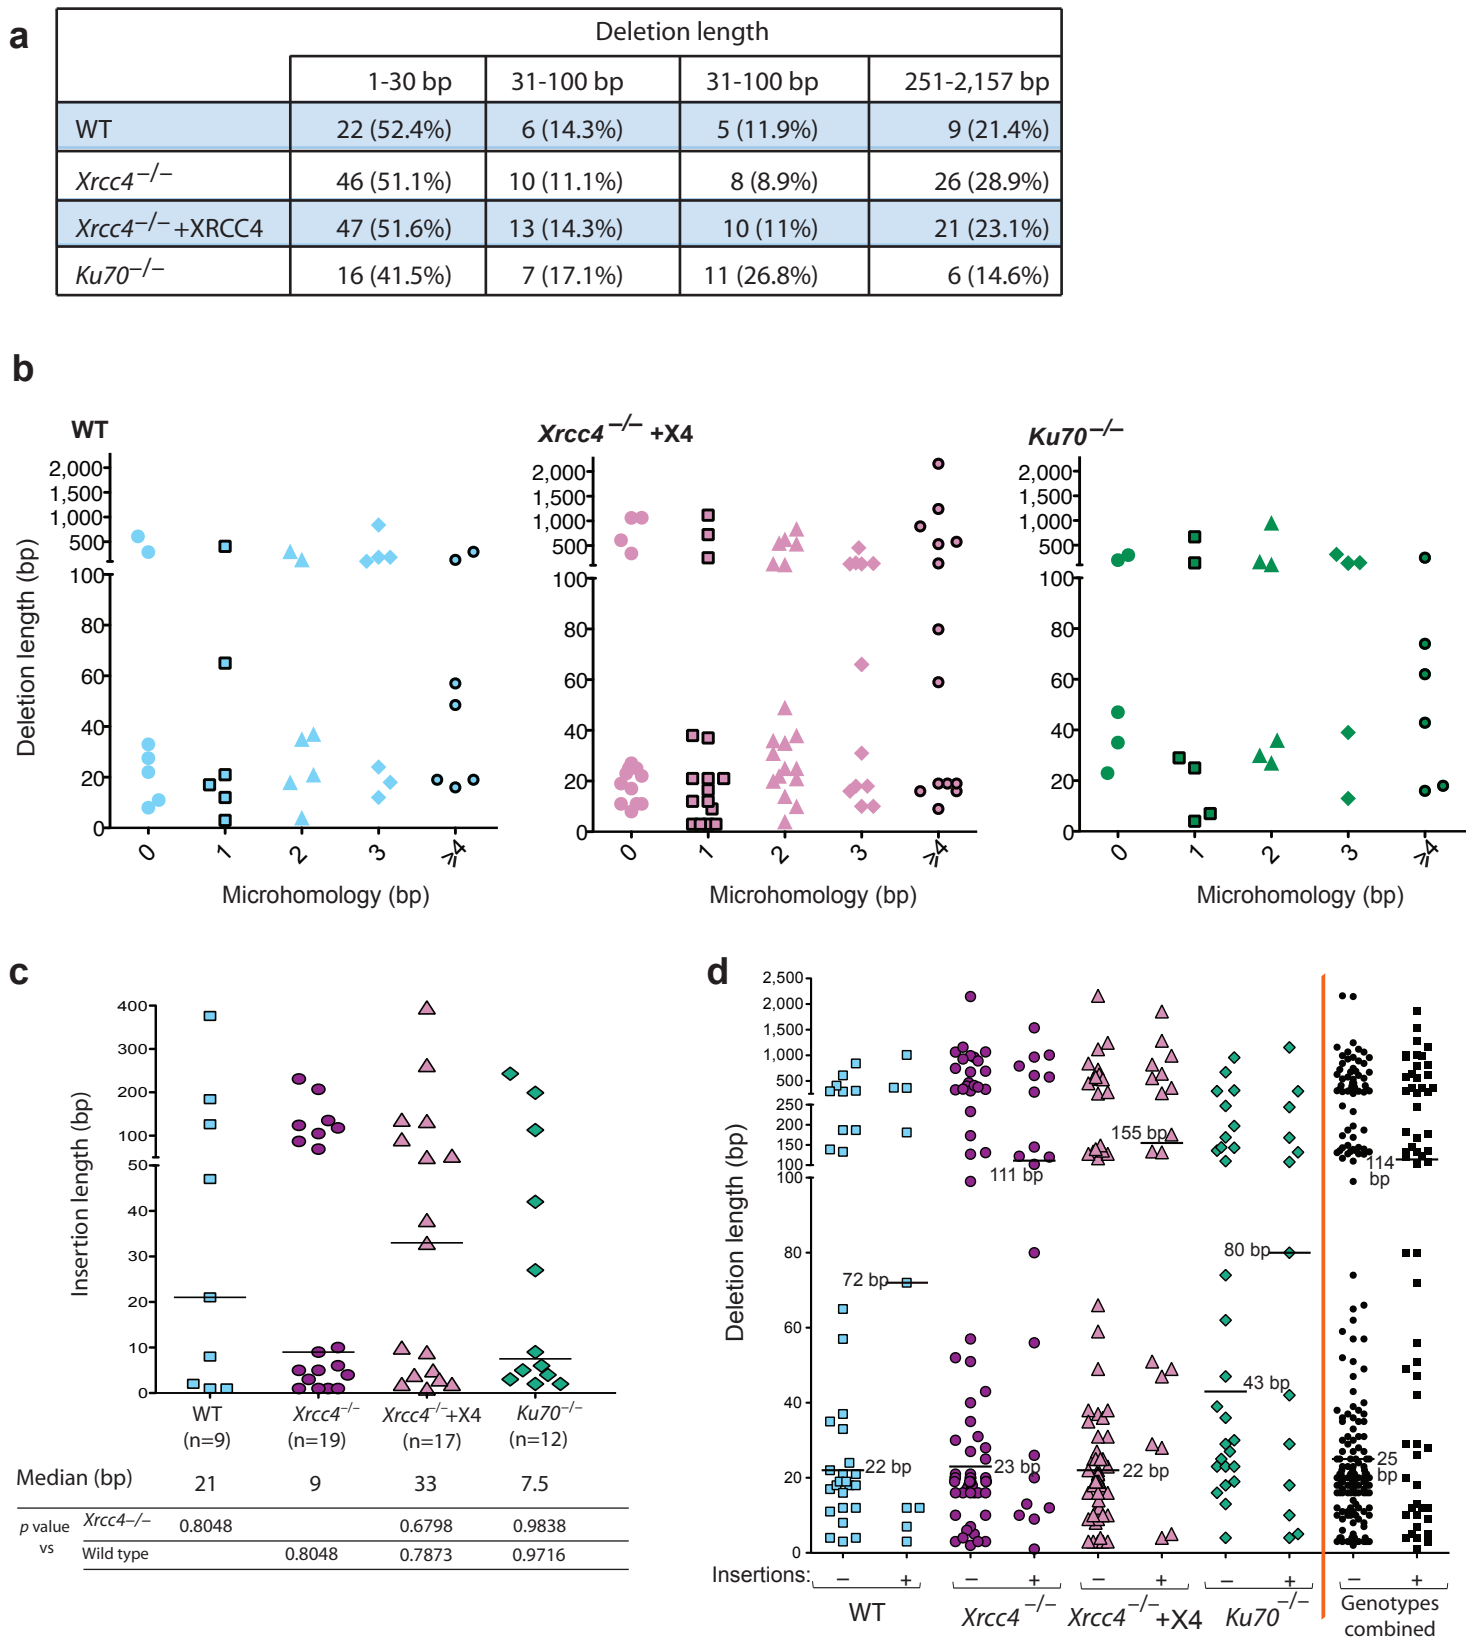



### **Supplementary Figure 3**

Analysis of der(17) translocation junction sequences.

- (a)** Distribution of deletion lengths for der(17) breakpoint junctions derived from the indicated genotypes. Each value represents the combined deletion from chrs. 17 and 14.
- (b)** Lack of correlation between deletion length and microhomology use for the indicated genotypes.
- (c)** Scatter plot of insertion lengths in der(17) junctions for the indicated genotypes. p values are derived from a two-tailed Mann-Whitney test.
- (d)** Distribution of deletion lengths for der(17) breakpoint junctions without and with insertions for the indicated genotypes. Each value represents the total deletion from chrs. 17 and 14. The median deletion length is indicated at the bar on the graph.

## Supplementary Figure 4

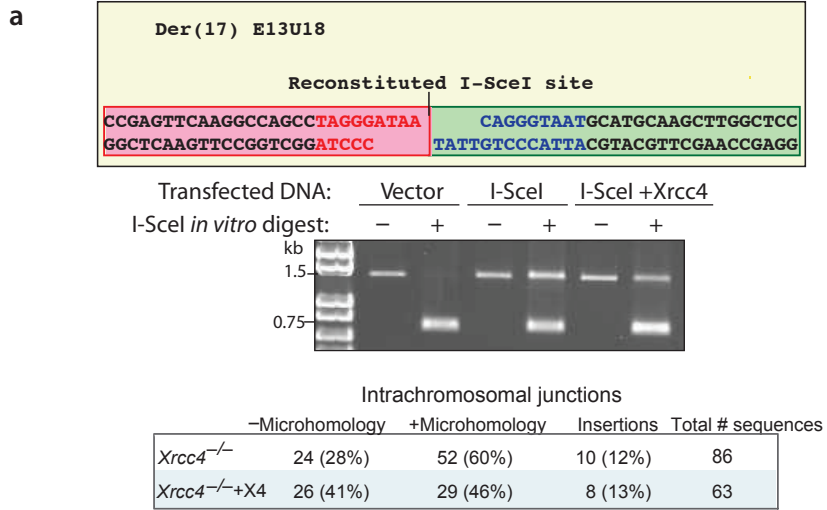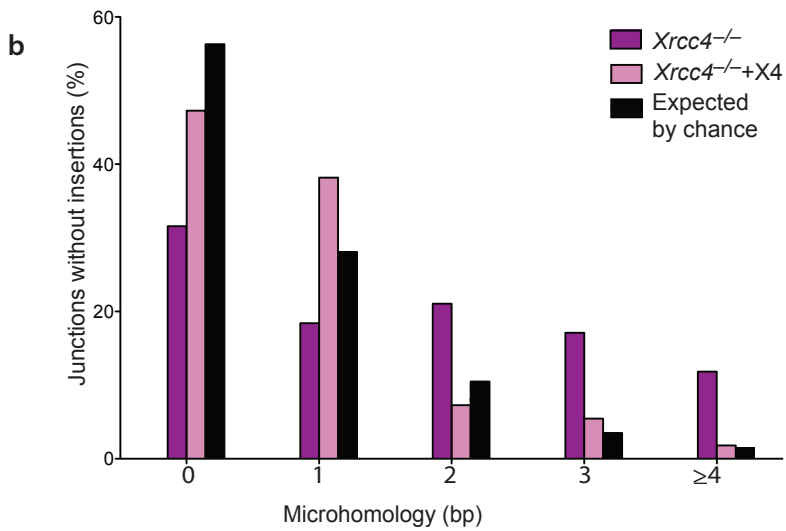

# Supplementary Figure 4, con't

c i) E13U18, *Xrcc4*-/-

|                                    |                    |                                 |
|------------------------------------|--------------------|---------------------------------|
| CCGAGTTCAAGCCAGCC <u>TAGGGATAA</u> |                    | ATAACAGGGTAATGCATGCAAGCTTGGCTCC |
| CCGAGTTCAAGCCAGCC <u>TAGGGATAA</u> |                    | ATAACAGGGTAATGCATGCAAGCTTGGCTCC |
| CCGAGTTCAAGCCAGCC <u>TAGGGATAA</u> | TA                 | ATAACAGGGTAATGCATGCAAGCTTGGCTCC |
| CCGAGTTCAAGCCAGCC <u>TAGGGATAA</u> | +46bp              | ATAACAGGGTAATGCATGCAAGCTTGGCTCC |
| CCGAGTTCAAGCCAGCC <u>TAGGGATAA</u> |                    | TAACAGGGTAATGCATGCAAGCTTGGCTCC  |
| CCGAGTTCAAGCCAGCC <u>TAGGGATAA</u> |                    | TAACAGGGTAATGCATGCAAGCTTGGCTCC  |
| CCGAGTTCAAGCCAGCC <u>TAGGGATAA</u> | TGCATG             | TAACAGGGTAATGCATGCAAGCTTGGCTCC  |
| CCGAGTTCAAGCCAGCC <u>TAGGGATAA</u> |                    | AACAGGGTAATGCATGCAAGCTTGGCTCC   |
| CCGAGTTCAAGCCAGCC <u>TAGGGAT</u>   |                    | TAACAGGGTAATGCATGCAAGCTTGGCTCC  |
| CCGAGTTCAAGCCAGCC <u>TAGGGATAA</u> |                    | ACAGGGTAATGCATGCAAGCTTGGCTCC    |
| CCGAGTTCAAGCCAGCC <u>TAGGG</u>     | GGCG               | ATAACAGGGTAATGCATGCAAGCTTGGCTCC |
| CCGAGTTCAAGCCAGCC <u>TAGGGATAA</u> | GGAGAA             | CAGGGTAATGCATGCAAGCTTGGCTCC     |
| CCGAGTTCAAGCCAGCC <u>TAGGGA</u>    |                    | AACAGGGTAATGCATGCAAGCTTGGCTCC   |
| CCGAGTTCAAGCCAGCC <u>TAGGGATA</u>  |                    | CAGGGTAATGCATGCAAGCTTGGCTCC     |
| CCGAGTTCAAGCCAGCC <u>TAGGGATA</u>  |                    | CAGGGTAATGCATGCAAGCTTGGCTCC     |
| CCGAGTTCAAGCCAGCC <u>TAGGGAT</u>   |                    | CAGGGTAATGCATGCAAGCTTGGCTCC     |
| CCGAGTTCAAGCCAGCC <u>TAGGGATA</u>  |                    | CAGGGTAATGCATGCAAGCTTGGCTCC     |
| CCGAGTTCAAGCCAGCC <u>TAGGGATAA</u> |                    | GGTAATGCATGCAAGCTTGGCTCC        |
| CCGAGTTCAAGCCAGCC <u>TAGGGATA</u>  |                    | GGTAATGCATGCAAGCTTGGCTCC        |
| CCGAGTTCAAGCCAGCC <u>TAGGGA</u>    |                    | CAGGGTAATGCATGCAAGCTTGGCTCC     |
| CCGAGTTCAAGCCAGCC <u>TAGGGA</u>    |                    | AGGGTAATGCATGCAAGCTTGGCTCC      |
| CCGAGTTCAAGCCAGCC <u>TAGGGATAA</u> |                    | TGCATGCAAGCTTGGCTCC             |
| CCGAGTTCAAGCCAGCC <u>TAGGGA</u>    |                    | GGTAATGCATGCAAGCTTGGCTCC        |
| CCGAGTTCAAGCCAGCC <u>TAGGGATAA</u> |                    | AATGCATGCAAGCTTGGCTCC           |
| CCGAGTTCAAGCCAGCC <u>TAGGG</u>     |                    | GGTAATGCATGCAAGCTTGGCTCC        |
| CCGAGTTCAAGCCAGCC <u>TAGGG</u>     |                    | GTAATGCATGCAAGCTTGGCTCC         |
| CCGAGTTCAAGCCAGCC <u>TAGGGATAA</u> |                    | TGCATGCAAGCTTGGCTCC             |
| CCGAGTTCAAGCCAGCC <u>TAGGGA</u>    | ATTTGTCTTTCATGATAC | TAATGCATGCAAGCTTGGCTCC          |
| CCGAGTTCAAGCCAGCC <u>TAGGGATAA</u> |                    | GCATGCAAGCTTGGCTCC              |
| CCGAGTTCAAGCCAGCC                  |                    | CAGGGTAATGCATGCAAGCTTGGCTCC     |
| CCGAGTTCAAGCCAGCC <u>TAGGG</u>     |                    | GTAATGCATGCAAGCTTGGCTCC         |
| CCGAGTTCAAGCCAGCC <u>TAGGG</u>     |                    | TAATGCATGCAAGCTTGGCTCC          |
| CCGAGTTCAAGCCAGCC <u>TAGGG</u>     |                    | TAATGCATGCAAGCTTGGCTCC          |
| CCGAGTTCAAGCCAGCC <u>TAGGG</u>     |                    | TAATGCATGCAAGCTTGGCTCC          |
| CCGAGTTCAAGCCAGCC                  |                    | AGGGTAATGCATGCAAGCTTGGCTCC      |
| CCGAGTTCAAGCCAGCC                  | TC                 | CAGGGTAATGCATGCAAGCTTGGCTCC     |
| CCGAGTTCAAGCCAGCC <u>TAGGGAT</u>   |                    | GCATGCAAGCTTGGCTCC              |
| CCGAGTTCAAGCCAGCC <u>TA</u>        |                    | TAATGCATGCAAGCTTGGCTCC          |
| CCGAGTTCAAGCCAGCC <u>T</u>         | GGGG               | TAATGCATGCAAGCTTGGCTCC          |
| CCGAGTTCAAGCCAGCC <u>TAGGGAT</u>   |                    | TGCAAGCTTGGCTCC                 |
| CCGAGTTCAAGCCAGCC <u>TAGGGATAA</u> |                    | CAAGCTTGGCTCC                   |
| CCGAGTTCAAGCCAGCC <u>TAGGGATAA</u> |                    | CAAGCTTGGCTCC                   |
| CCGAGTTCAAGCCAGCC <u>TA</u>        |                    | ATGCATGCAAGCTTGGCTCC            |
| CCGAGTTCAAGCCAGCC <u>TA</u>        |                    | ATGCATGCAAGCTTGGCTCC            |
| CCGAGTTCAAGCCAGCC <u>TAGGG</u>     | GG                 | ATGCAAGCTTGGCTCC                |
| CCGAGTTCAAGCCAGCC                  |                    | ATGCATGCAAGCTTGGCTCC            |
| CCGAGTTCAAGCC                      |                    | GGTAATGCATGCAAGCTTGGCTCC        |
| CCGAGTTCAAGCC                      |                    | GGTAATGCATGCAAGCTTGGCTCC        |
| CCGAGTTCAAGCC <u>TAG</u>           |                    | CAAGCTTGGCTCC                   |
| CCGAGTTCAAGCCAGCC <u>TAGGGATAA</u> |                    | GCTTGGCTCC                      |
| CCGAGTTCA <u>A</u>                 |                    | CAGGGTAATGCATGCAAGCTTGGCTCC     |
| CCGAGTTCA <u>AGG</u>               |                    | TAATGCATGCAAGCTTGGCTCC          |
| CCGAGTTCAAGCC <u>A</u>             |                    | TGCAAGCTTGGCTCC                 |
| CCGAGTTCA                          |                    | GGTAATGCATGCAAGCTTGGCTCC        |
| CCGAGTTCA <u>A</u>                 |                    | TGCATGCAAGCTTGGCTCC             |
| CCGAGT                             | ATGCA              | GGGTAATGCATGCAAGCTTGGCTCC       |
| CC                                 |                    | CAGGGTAATGCATGCAAGCTTGGCTCC     |
| CCGAGTTCAAGCCAGCC <u>TAGGG</u>     |                    | GCTCC                           |
| CCGAGTTCAAGCCAGCC                  |                    | TTGGCTCC                        |
| CCGAGTTCAAGCCAGCC                  |                    | TTGGCTCC                        |
| CCGAGTTCAAGCCAGCC                  |                    | TTGGCTCC                        |
| CCGAGTTCAAGCC                      |                    | TTGGCTCC                        |
| CCGAGTTCAAGCCAGCC <u>T</u>         |                    | CC                              |
| CCGAGTTCAAG                        |                    | CTTGGCTCC                       |
| CCGAGTTCAAG                        |                    | CTTGGCTCC                       |
| CTCCGA                             |                    | -39del AAT                      |
| TTG -49del                         |                    | CAAGCTTGGCTCC                   |
| CCGAGTTCAAGG                       |                    | -60del GGA                      |
| CAGC -54del                        |                    | TTGGCTCC                        |
| CCGAGTTCAAGCCAGCC <u>T</u>         | +318bp             | -77del CAG                      |
| GTGG -73del                        |                    | CTCC                            |
| GAG -39del                         |                    | -65del TGT                      |
| GCCCT -51del                       |                    | -62del ATT                      |
| CCGAGTTCAAGCCAGCC <u>TA</u>        |                    | -118del CTA                     |
| CCGAGTTCAAGCCAGCC <u>TAGGGATAA</u> |                    | -127del GTA                     |
| TGA -93del                         |                    | -107del AAG                     |
| CCGAGTTCAAGCCAGCC                  |                    | -318del TCA                     |
| CCGAGTTCAAGCCAGCC <u>TAGGGATA</u>  |                    | -418del CTT                     |
| CCGAGTTCAAGCCAGCC                  |                    | -481del TCA                     |

Supplementary Figure 4, con't  
 c ii) E13U18, *Xrcc4*<sup>-/-</sup> +*Xrcc4*

|                             |         |                                 |
|-----------------------------|---------|---------------------------------|
| CCGAGTTCAAGGCCAGCCTAGGGATAA |         | ATAACAGGGTAATGCATGCAAGCTTGGCTCC |
| CCGAGTTCAAGGCCAGCCTAGGGATAA | TAAT    | ATAACAGGGTAATGCATGCAAGCTTGGCTCC |
| CCGAGTTCAAGGCCAGCCTAGGGATAA |         | TAACAGGGTAATGCATGCAAGCTTGGCTCC  |
| CCGAGTTCAAGGCCAGCCTAGGGATAA |         | TAACAGGGTAATGCATGCAAGCTTGGCTCC  |
| CCGAGTTCAAGGCCAGCCTAGGGATAA |         | TAACAGGGTAATGCATGCAAGCTTGGCTCC  |
| CCGAGTTCAAGGCCAGCCTAGGGATAA |         | ACAGGGTAATGCATGCAAGCTTGGCTCC    |
| CCGAGTTCAAGGCCAGCCTAGGGATAA |         | ACAGGGTAATGCATGCAAGCTTGGCTCC    |
| CCGAGTTCAAGGCCAGCCTAGGGATAA |         | ACAGGGTAATGCATGCAAGCTTGGCTCC    |
| CCGAGTTCAAGGCCAGCCTAGGGATAA | AT      | CAGGGTAATGCATGCAAGCTTGGCTCC     |
| CCGAGTTCAAGGCCAGCCTAGGG     | GGCCGGA | ATAACAGGGTAATGCATGCAAGCTTGGCTCC |
| CCGAGTTCAAGGCCAGCCTAGGG     | GGCGGGC | ATAACAGGGTAATGCATGCAAGCTTGGCTCC |
| CCGAGTTCAAGGCCAGCCTAGGGATAA |         | AGGGTAATGCATGCAAGCTTGGCTCC      |
| CCGAGTTCAAGGCCAGCCTAGGGATA  |         | CAGGGTAATGCATGCAAGCTTGGCTCC     |
| CCGAGTTCAAGGCCAGCCTAGGGATA  |         | CAGGGTAATGCATGCAAGCTTGGCTCC     |
| CCGAGTTCAAGGCCAGCCTAG       |         | ATAACAGGGTAATGCATGCAAGCTTGGCTCC |
| CCGAGTTCAAGGCCAGCCTAG       |         | ATAACAGGGTAATGCATGCAAGCTTGGCTCC |
| CCGAGTTCAAGGCCAGCCTAGGGATAA |         | GGGTAATGCATGCAAGCTTGGCTCC       |
| CCGAGTTCAAGGCCAGCCTAGGGATAA |         | GGGTAATGCATGCAAGCTTGGCTCC       |
| CCGAGTTCAAGGCCAGCCTAGGGATA  | TA      | AGGGTAATGCATGCAAGCTTGGCTCC      |
| CCGAGTTCAAGGCCAGCCTAGGGA    | CCTAT   | AACAGGGTAATGCATGCAAGCTTGGCTCC   |
| CCGAGTTCAAGGCCAGCCTAGG      |         | AACAGGGTAATGCATGCAAGCTTGGCTCC   |
| CCGAGTTCAAGGCCAGCCTA        |         | ATAACAGGGTAATGCATGCAAGCTTGGCTCC |
| CCGAGTTCAAGGCCAGCCTAGGGAT   |         | GGGTAATGCATGCAAGCTTGGCTCC       |
| CCGAGTTCAAGGCCAGCCTAGGGAT   |         | GGGTAATGCATGCAAGCTTGGCTCC       |
| CCGAGTTCAAGGCCAGCCTAGGGATAA |         | GTAATGCATGCAAGCTTGGCTCC         |
| CCGAGTTCAAGGCCAGCC          |         | ATAACAGGGTAATGCATGCAAGCTTGGCTCC |
| CCGAGTTCAAGGCCAGCCTAGG      |         | ACAGGGTAATGCATGCAAGCTTGGCTCC    |
| CCGAGTTCAAGGCCAGCCTAGGGA    |         | GGGTAATGCATGCAAGCTTGGCTCC       |
| CCGAGTTCAAGGCCAGCCTAGG      | AT      | CAGGGTAATGCATGCAAGCTTGGCTCC     |
| CCGAGTTCAAGGCCAGCCTAGGGATA  |         | TAATGCATGCAAGCTTGGCTCC          |
| CCGAGTTCAAGGCCAGCCTAGGGA    |         | GGTAATGCATGCAAGCTTGGCTCC        |
| CCGAGTTCAAGGCCAGCCTAGGGATAA |         | AATGCATGCAAGCTTGGCTCC           |
| CCGAGTTCAAGGCCAG            |         | ATAACAGGGTAATGCATGCAAGCTTGGCTCC |
| CCGAGTTCAAGGCCAGCCTAGGGATAA |         | ATGCATGCAAGCTTGGCTCC            |
| CCGAGTTCAAGGCCAGCCTAGGGATAA |         | ATGCATGCAAGCTTGGCTCC            |
| CCGAGTTCAAGGCCAGCCTAGGGATAA |         | TGCATGCAAGCTTGGCTCC             |
| CCGAGTTCAAGGCCAGCCTAGGGATAA |         | GCATGCAAGCTTGGCTCC              |
| CCGAGTTCAAGGCCAGCC          |         | CAGGGTAATGCATGCAAGCTTGGCTCC     |
| CCGAGTTCAAGGCCAGCC          |         | CAGGGTAATGCATGCAAGCTTGGCTCC     |
| CCGAGTTCAAGGCCAGCCTAGGG     |         | TAATGCATGCAAGCTTGGCTCC          |
| CCGAGTTCAAGGCCAGCCTAGG      |         | TAATGCATGCAAGCTTGGCTCC          |
| CCGAGTTCAAGGCCAGCCTAG       |         | TAATGCATGCAAGCTTGGCTCC          |
| CCGAGTTCAAGGCCA             |         | ACAGGGTAATGCATGCAAGCTTGGCTCC    |
| CCGAGTTCAAGGCCAGCCTAGGGAT   |         | GCATGCAAGCTTGGCTCC              |
| CCGAGTTCAAGGCCAGCCTAGGG     |         | TGCATGCAAGCTTGGCTCC             |
| CCGAGTTCAAGGCCAGCCTA        |         | TAATGCATGCAAGCTTGGCTCC          |
| CCGAGTTCAAGGCCAGCCTAGGGATAA |         | AGCTTGGCTCC                     |
| CCGAGTTCAAGGCCAGCCTAGG      |         | TGCAAGCTTGGCTCC                 |
| CCGAGTTCAAGGCCAGCCTAGGGATA  |         | GCTTGGCTCC                      |
| CCGAGTTCAAGGCCAG            |         | ATGCATGCAAGCTTGGCTCC            |
| CCGAGTTC                    |         | CAGGGTAATGCATGCAAGCTTGGCTCC     |
| CCGAGTTCAAGGCCAGCCTAGGG     |         | CTTGGCTCC                       |
| CCGAGTT                     |         | TAATGCATGCAAGCTTGGCTCC          |
| CCGAGTTCAAGGCCAGC           |         | AAGCTTGGCTCC                    |
| CCG                         |         | GTAATGCATGCAAGCTTGGCTCC         |
| CCGAGTTCAAGGCCAGC           |         | TTGGCTCC                        |
| CCGAGTTCAAGGCCAGCCTAGGGA    |         | -33del CTC                      |
| CCGAGTTCAAGGC               |         | TGGCTCC                         |
| CCGAGTTCAAGGCCAGCC          | CAAGG   | CC                              |
| CAGC -54del                 |         | TTGGCTCC                        |
| CTTG -67del                 |         | CTTGGCTCC                       |
| TAT -107del                 |         | GGCTCC                          |
| CCGAGTTCAAGGCCAGC           |         | -289del GGA                     |

#### Supplementary Figure 4

Comparison of intrachromosomal repair of a single I-SceI DSB in complemented and uncomplemented *Xrcc4*<sup>-/-</sup> cells.

- (a) To maintain a similar sequence context to that of translocation formation, we used a translocation clone, E13U18, derived from *Xrcc4*<sup>-/-</sup> cells that fortuitously reconstituted an I-SceI site (red and blue sequences) on der(17). The chr. 17 sequence (red shading) is the same in both the intrachromosomal and translocation assays, whereas the chr. 14 sequence is deleted for 10 bp compared with the translocation assays. After PCR with primers 17-754 and 14-726, a 1.5 kb band is amplified from E13U18 genomic DNA which is cleavable by I-SceI *in vitro* to 0.75 kb fragments. Prior expression of I-SceI in cells with or without coexpression of *Xrcc4* leads to an I-SceI resistant population due to loss of the I-SceI site. Cloning and sequencing of the I-SceI resistant population led to the identification of intrachromosomal junctions, which were characterized for whether or not microhomology or insertions were present at the junctions.
- (b) Distribution of microhomology lengths for intrachromosomal junctions after I-SceI expression. Only junctions with simple deletions (i.e., without an insertion) are included.
- (c) Intrachromosomal junction sequences obtained from E13U18 *Xrcc4*<sup>-/-</sup> (i) and *Xrcc4*-complemented *Xrcc4*<sup>-/-</sup> (ii) cells.

# Supplementary Figure 5

## a Wild type

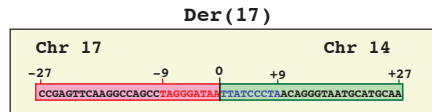

**E14P20**  
 Interstitial duplication of 2 bp  
 (chr 17: -355 to -354)

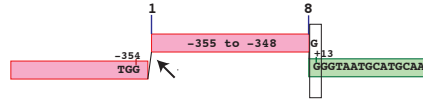

**E14P18**  
 Interstitial deletion of 7 bp  
 (chr 14: +26 to +32)  
 plus 2bp insertion

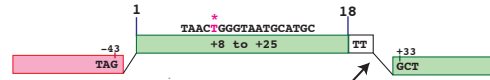

**E13P13**

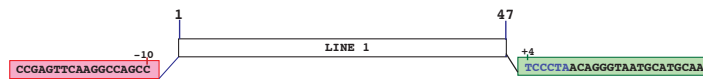

**E14P8**

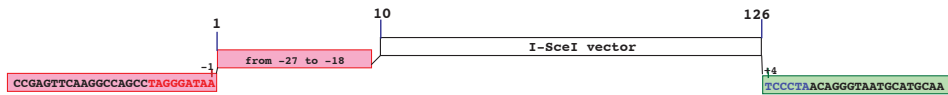

**E14P17**  
 Chr 14 inserts are  
 nearly contiguous  
 but in opposite orientation.

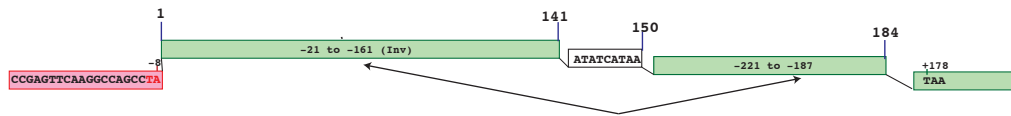

**E14P9**

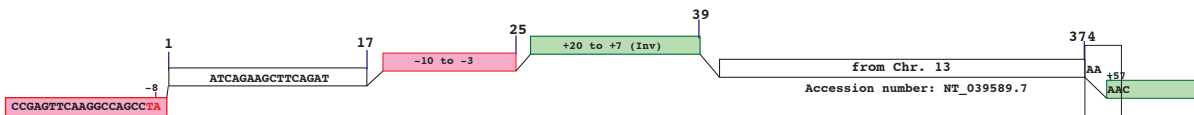

Supplementary Figure 5, con't

b *Xrcc4*<sup>-/-</sup>

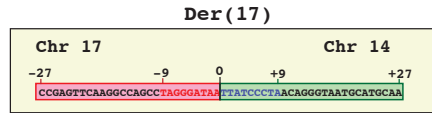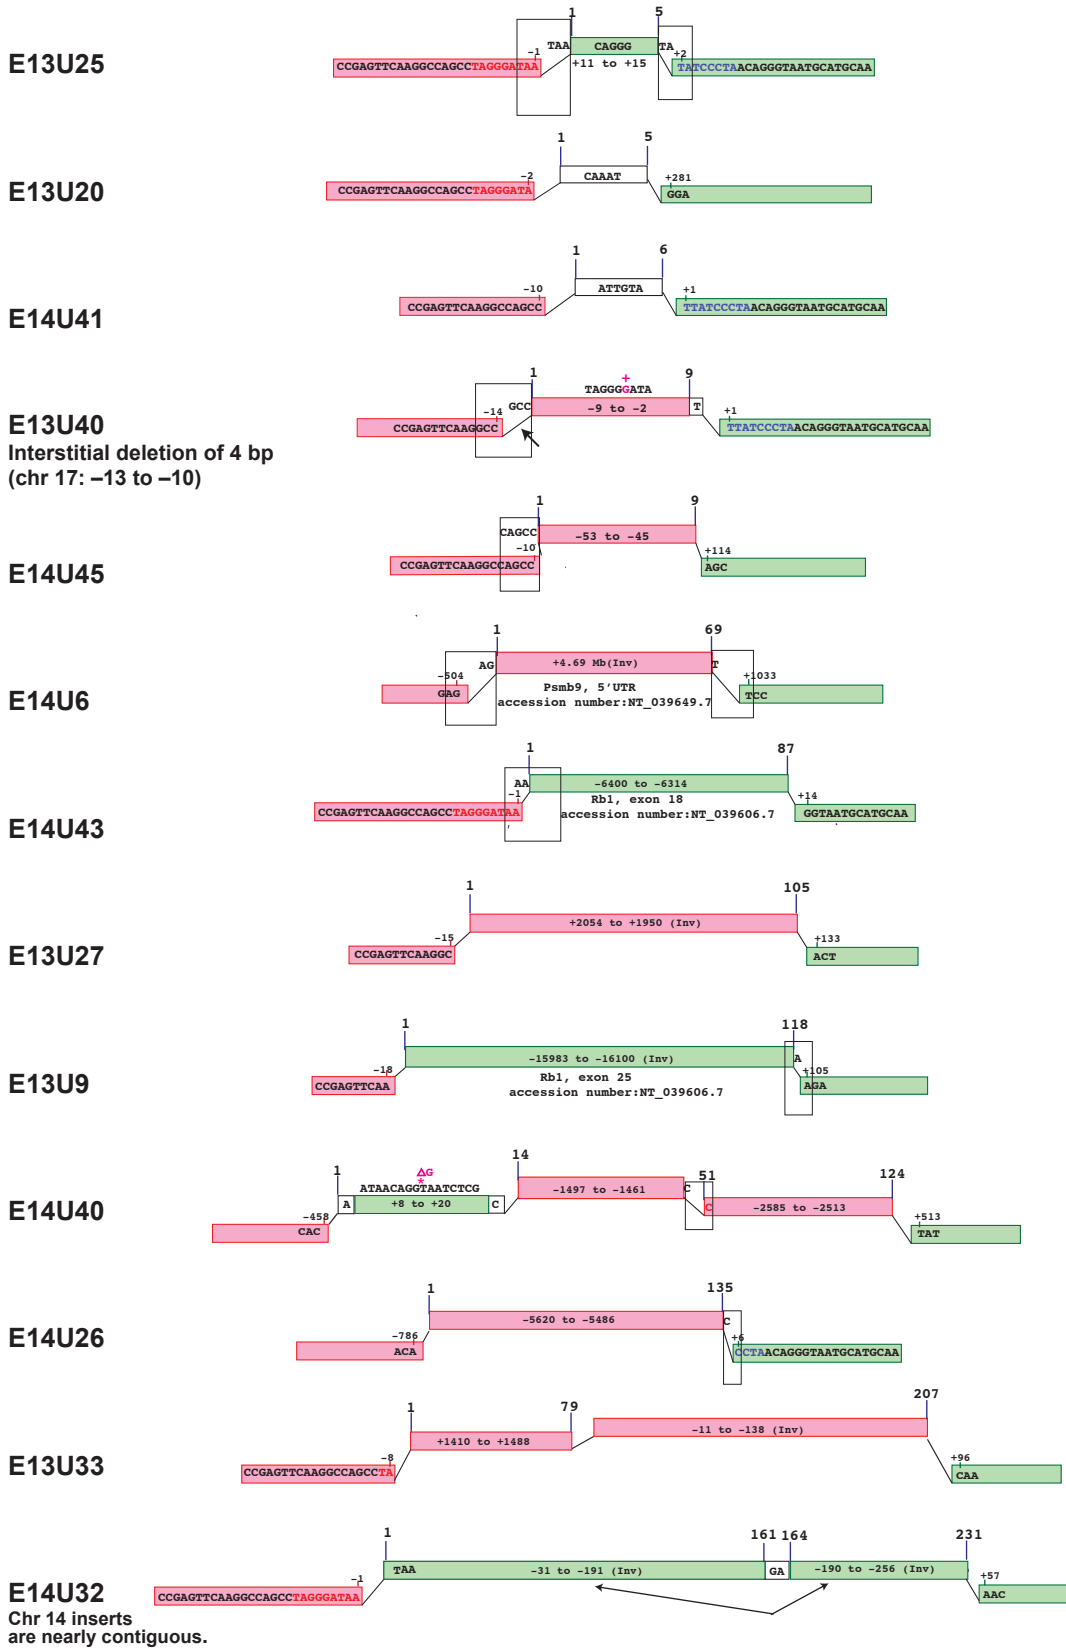

Supplementary Figure 5, con't

C *Xrcc4*<sup>-/-</sup> + *Xrcc4*

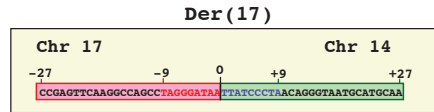

E14X27

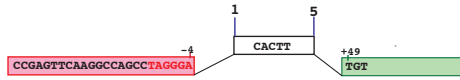

E14X6

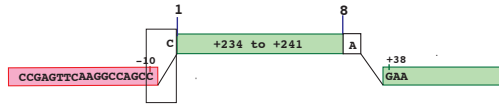

E14X1

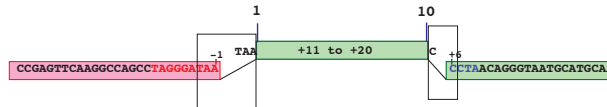

E13X10

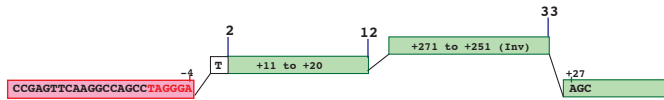

E14X25

Interstitial deletion of 5 bp  
(chr 17: -51 to -47) associated  
with inversion

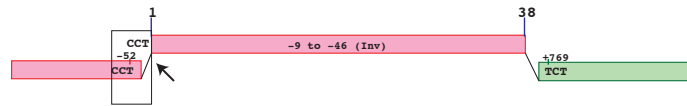

E13X25

Interstitial 8 bp duplication  
(chr 17: -30 to -37) associated  
with inversion and 1 bp substitution  
(chr 14: "C" at +232)

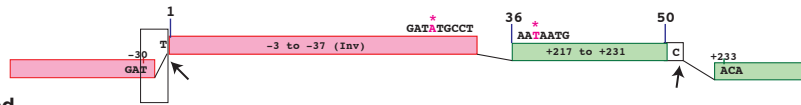

E14X31

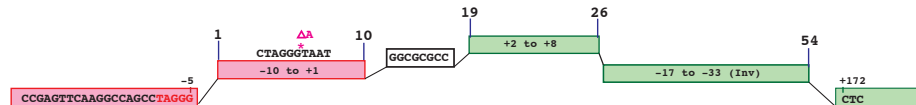

E13X37

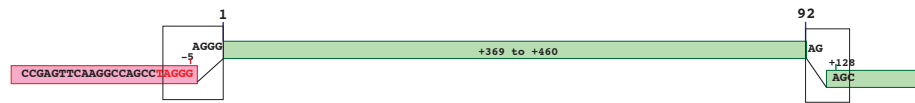

E13X22

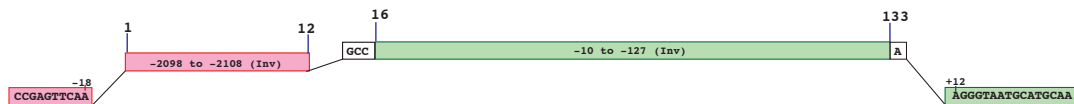

E13X2

Interstitial deletion of  
5 bp (chr 17: -1275 to -1271)

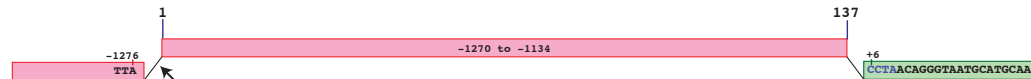

E14X36

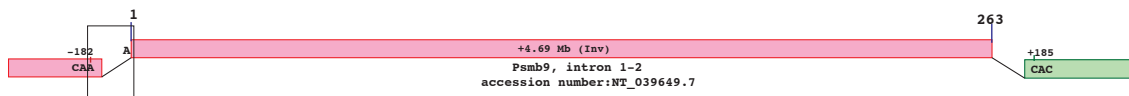

E14X35

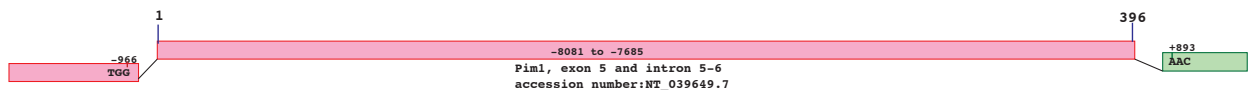



Supplementary Figure 5, con't

d *Ku70*<sup>-/-</sup>

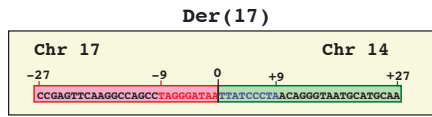

E13K23

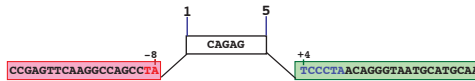

E13K4  
Interstitial 2 bp duplication  
associated with inversion  
(chr 17: -4 to -7)

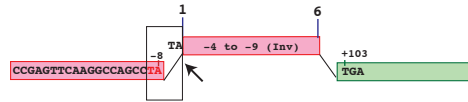

E13K6

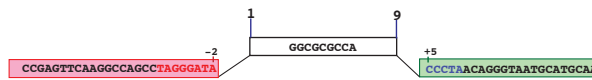

E13K22

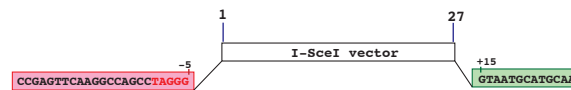

E14K13

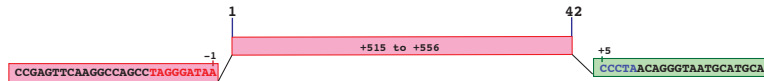

E13K7

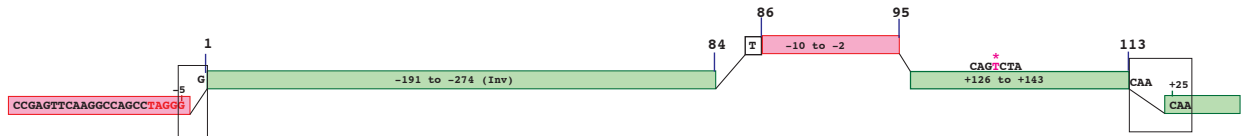

E13K3

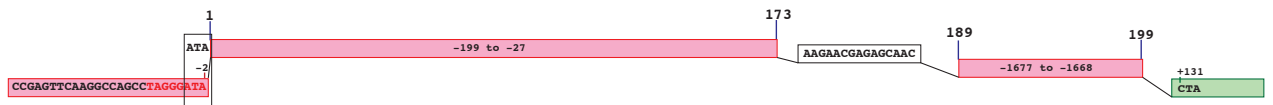

E13K15

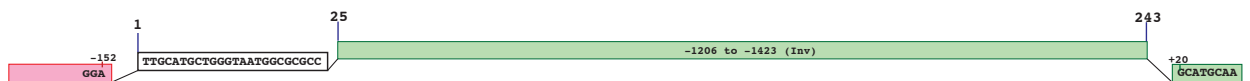

### Supplementary Figure 5

Derivation of insertions found in wild-type (a), *Xrcc4*<sup>-/-</sup> (b), *Xrcc4*-complemented *Xrcc4*<sup>-/-</sup> (c), and *Ku70*<sup>-/-</sup> (d) der(17) breakpoint junctions. For each translocation breakpoint junction, deletion lengths from the chrs.17 and 14 ends are indicated in red and green boxes on the far left and far right, respectively, with the inserted segments represented as elevated boxes connected to each end. Inserts derived from chrs. 17 and 14 are indicated in the elevated red and green boxes, respectively, while those derived from sources are in white boxes. Included in this analysis are all inserted sequences >4 bp; for 1-4 bp insertions see Supplementary Fig. 2. Cases in which the inserted sequences are not a perfect match are indicated in magenta with an asterisk (point mutation), Δ (deletion), or + (addition). Accession numbers are provided for inserts derived from distant sequences. Microhomologies are boxed. Inv, inverted.
